# Supplementary material for: Porous MoS2 nanosheets for the fast decomposition of energetic compounds
Source: Royal Society of Chemistry journal article supplement (doi:10.1039/d2dt00035k), 2022-01-01
Supplement: d2dt00035k1.pdf [file d2dt00035k1.pdf]

## Supporting information

Porous MoS<sub>2</sub> nanosheets for the fast decomposition of energetic compounds

Xu Zhao,<sup>1</sup> Jianhu Zhang,<sup>1</sup> Feiyan Gong,<sup>1</sup> Bin Huang\*,<sup>2</sup> Zhijian Yang<sup>1\*</sup>

<sup>1</sup> Institute of Chemical Materials, China Academy of Engineering Physics, Mianyang  
621900, P. R. of China. Email: [zhijianyang@caep.cn](mailto:zhijianyang@caep.cn)

<sup>2</sup> College of Chemistry and Bioengineering, Guilin University of Technology, Guilin,  
541004, China. Email: [bin@glut.edu.cn](mailto:bin@glut.edu.cn)

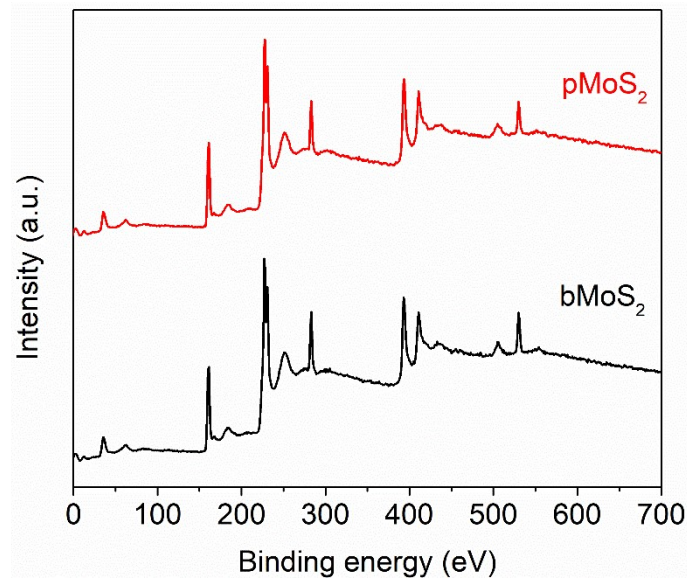

**Figure S1.** XPS total survey of pMoS<sub>2</sub> (red line) and bMoS<sub>2</sub> (black line).

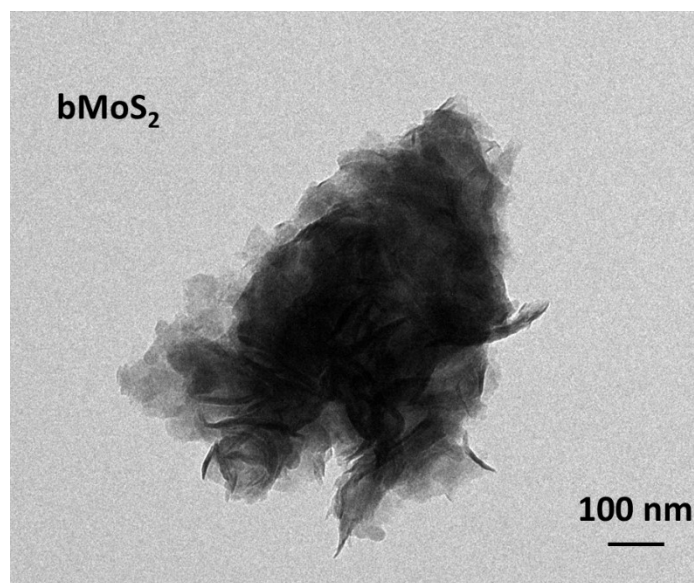

**Figure S2.** Low-magnification TEM image of bMoS<sub>2</sub>, showing a dense structure.

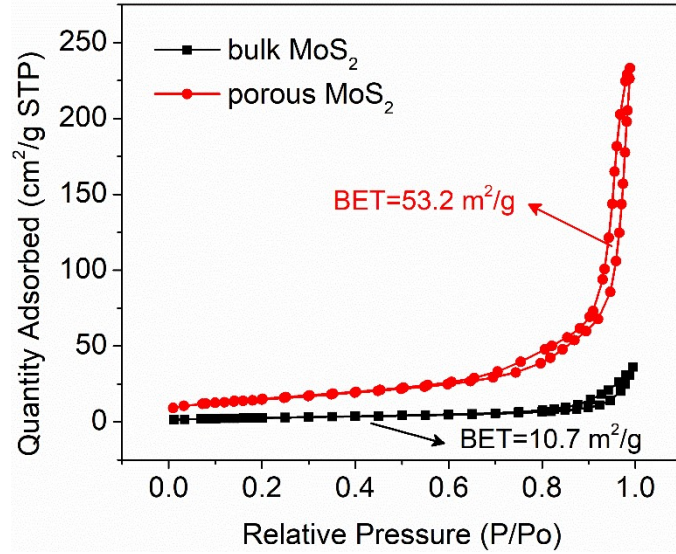

Figure S3. Nitrogen sorption isotherm of bulk and porous MoS<sub>2</sub>.

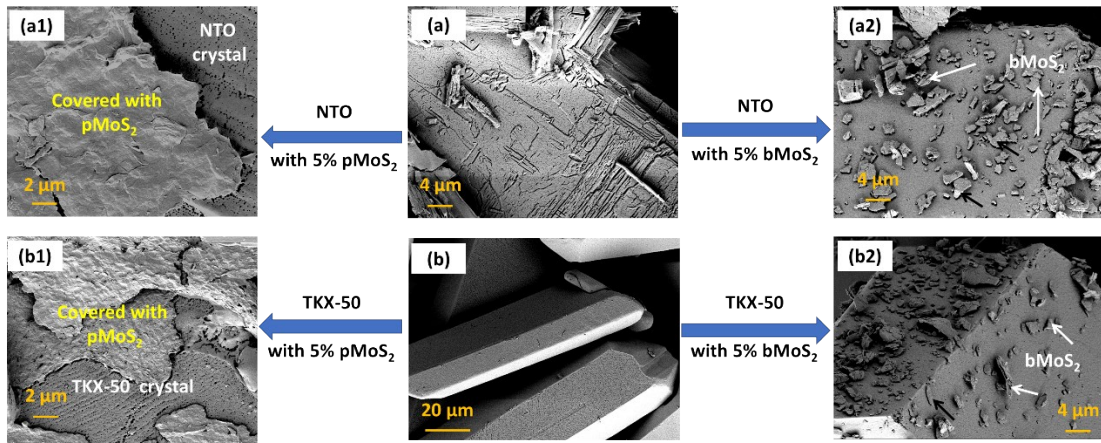

Figure S4. SEM images of NTO and TKX-50 with 5% MoS<sub>2</sub> additive in bulk and porous form.

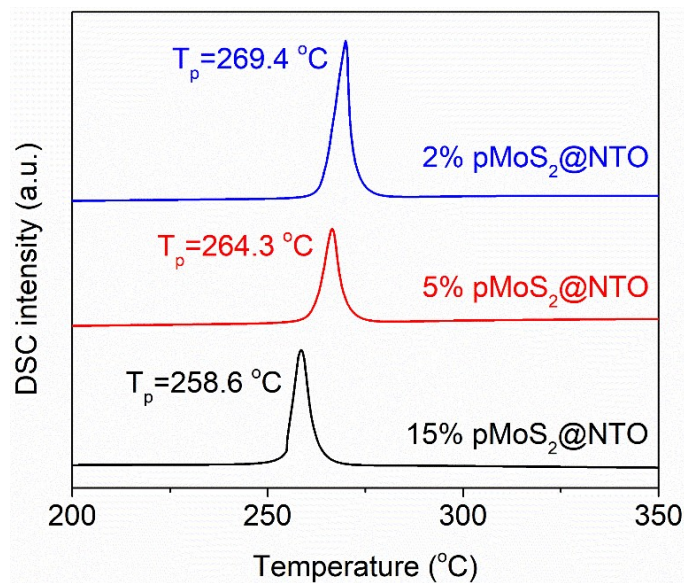

**Figure S5.** The DSC curves of NTO complexed with various mass loading pMoS<sub>2</sub>.

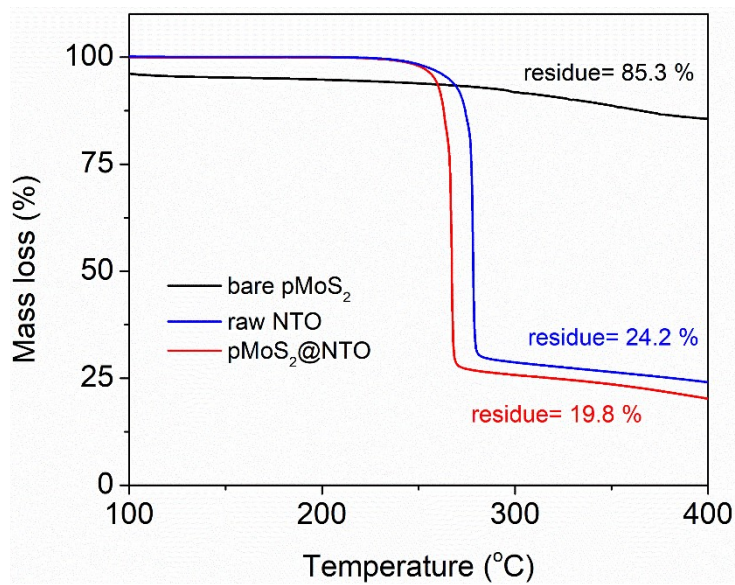

**Figure S6.** The TG curves of NTO complexed with pMoS<sub>2</sub> and bMoS<sub>2</sub>.

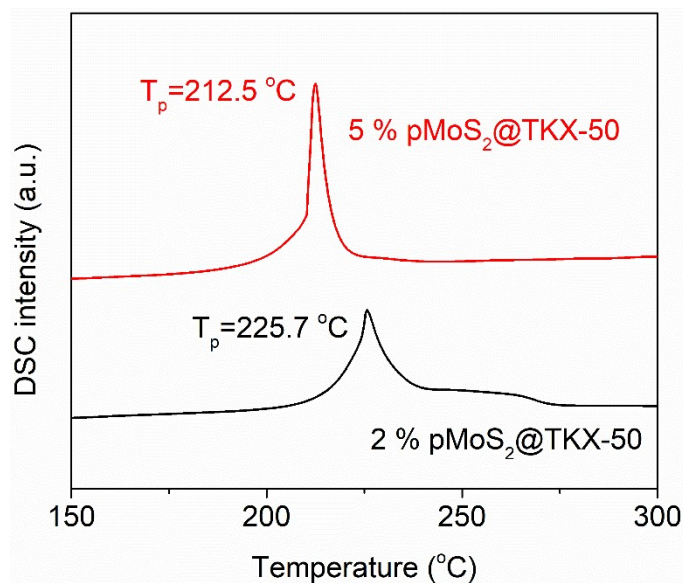

**Figure S7.** DSC curves of TKX-50 with various pMoS<sub>2</sub> loading.

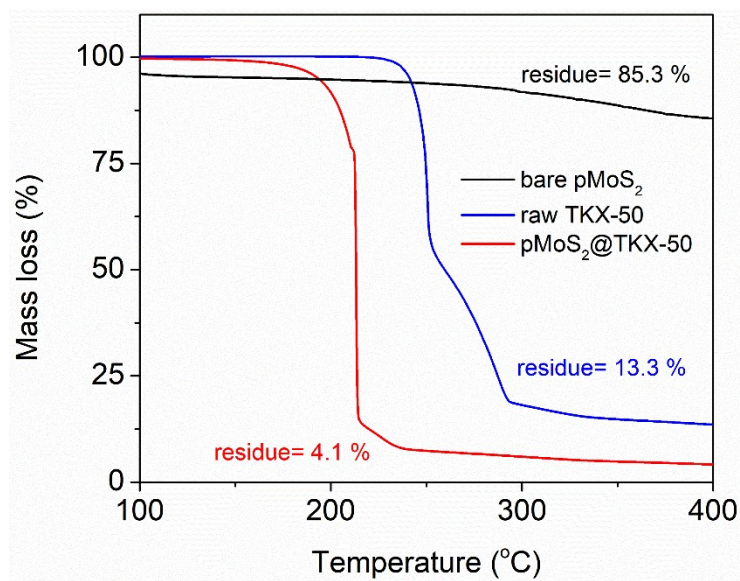

**Figure S8.** The TG curves of TKX-50 complexed with pMoS<sub>2</sub> and bMoS<sub>2</sub>.

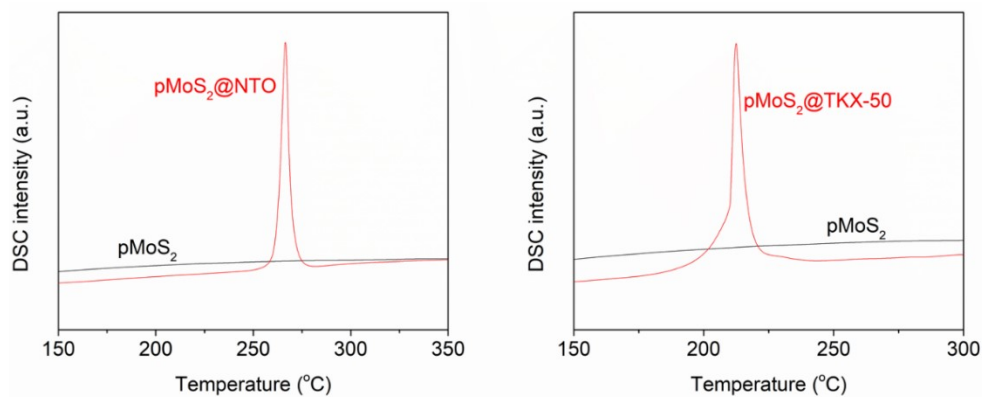

**Figure S9.** DSC curves of pMoS<sub>2</sub> compared with that of pMoS<sub>2</sub>@NTO and pMoS<sub>2</sub>@TKX-50.

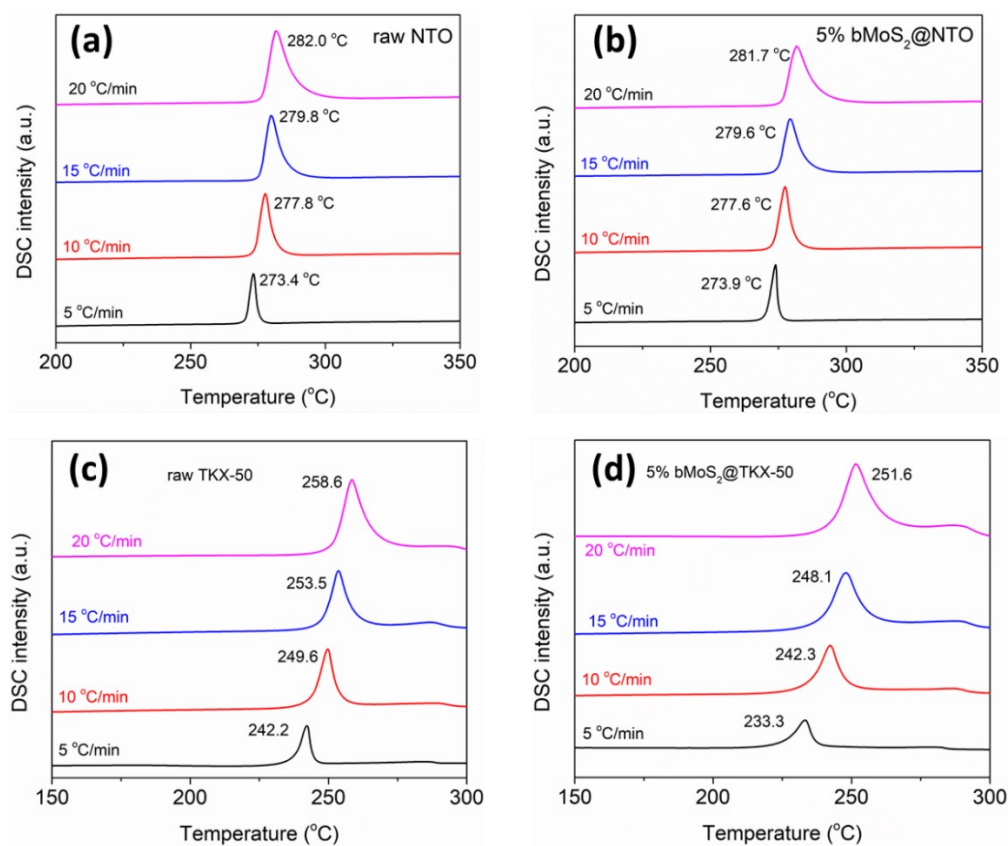

**Figure S10.** DSC curves of (a) raw NTO, (b) bMoS<sub>2</sub>@NTO, (c) raw TKX-50 and (d) bMoS<sub>2</sub>@TKX-50.
